# Supplementary material for: Temporal Summation in Fibromyalgia Patients: Comparing Phasic and Tonic Paradigms
Source: PubMed Central journal article supplement (PMC9261961; doi:10.3389/fpain.2022.881543), 2022-06-22
Supplement: Image_1.pdf [file Image_1.pdf]

# Supplementary Figure 1.

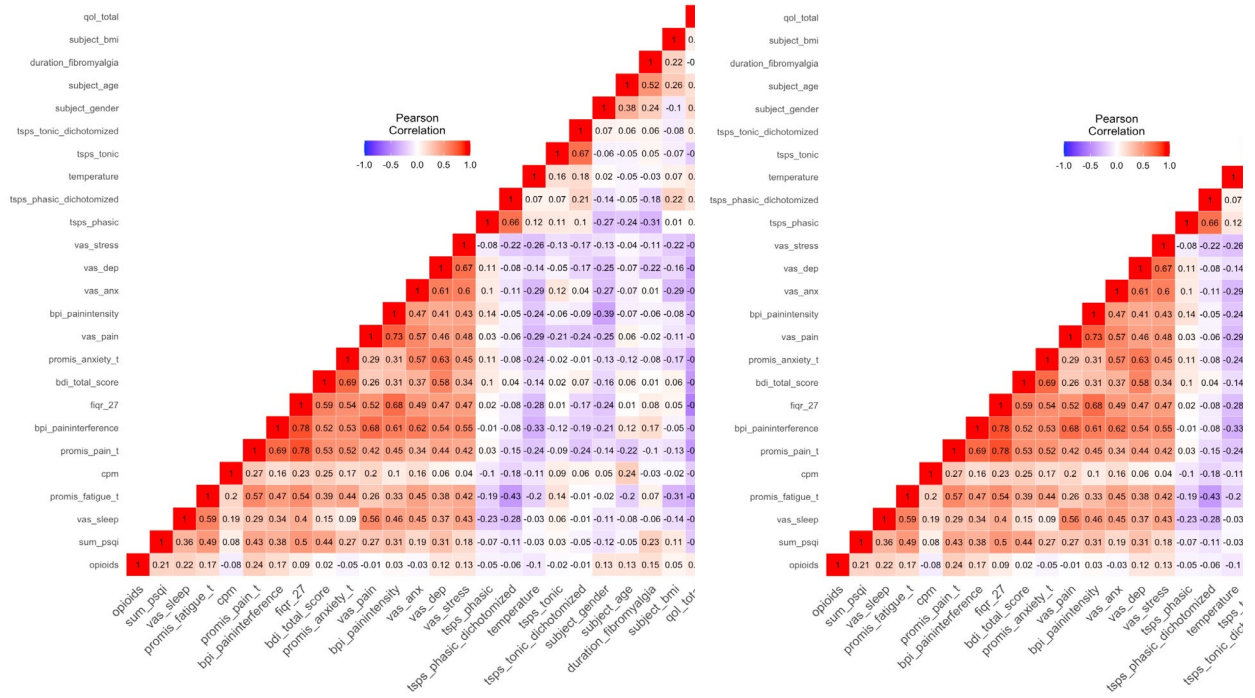

Heatmap with Pearson Correlations
